# Supplementary material
Source: publisher figshare collection journal article supplement (https://tandf.figshare.com/articles/dataset/_/8957879)
Supplement: Supplementary file 1 [file 1]

Table S1. Physicochemical properties of target compounds

| Compound                     | IUPAC name                                                                                      | CAS RN.     | Chemical structure                                                                    | Water solubility (mg/L) | LogKow | pKa  |
|------------------------------|-------------------------------------------------------------------------------------------------|-------------|---------------------------------------------------------------------------------------|-------------------------|--------|------|
| Oseltamivir phosphate (OP)   | Ethyl (3R,4R,5S)-4-acetamido-5-amino-3-pentan-3-yloxy-cyclohexene-1-carboxylate;phosphoric acid | 204255-11-8 | 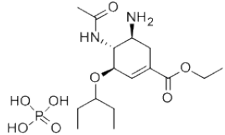   | 1,600                   | 0.95   | 7.7  |
| Oseltamivir carboxylate (OC) | (3R,4R,5S)-4-acetamido-5-amino-3-pentan-3-yloxy-cyclohexene-1-carboxylic acid                   | 187227-45-8 |    | -                       | -2.1   | 3.6  |
| Caffeine (CAF)               | 1,3,7-trimethylpurine-2,6-dione                                                                 | 58-08-2     |    | 21,600                  | -0.07  | 10.4 |
| Carbamazepine (CBZ)          | Benzo[b][1]benzazepine-11-carboxamide                                                           | 298-46-4    |    | 18                      | 13.9   | 2.45 |
| Triclosan (TCS)              | 5-chloro-2-(2,4-dichlorophenoxy)phenol                                                          | 3380-34-5   |  | 10                      | 4.76   | 7.9  |
| Triclocarban (TCC)           | 1-(4-chlorophenyl)-3-(3,4-dichlorophenyl)urea                                                   | 101-20-2    |  | 0.00237                 | 4.90   | -    |

Reference sites of water solubility, Log Kow, and pKa values: Pubchem, <https://pubchem.ncbi.nlm.nih.gov/compound/65492> and C. Prasse, M.P. Schlüsener, R. Schulz, T.A. Ternes, Environ. Sci. Technol. 44, 1728 (2010).
