# Supplementary material
Source: publisher figshare collection journal article supplement (https://tandf.figshare.com/articles/dataset/_/8957879)
Supplement: Supplementary file 2 [file 1]

Table S3. Recovery results (%) of target and labelled compounds eluted with various solvents using an OasisHLB cartridge

| Elution solvent              |         | OP     |          | OC     |          | CAF    |          | CBZ    |          | TCS    |          | TCC    |          |
|------------------------------|---------|--------|----------|--------|----------|--------|----------|--------|----------|--------|----------|--------|----------|
|                              |         | Native | Labelled |
| Acetone*                     |         | 77     | 80       | 41     | 42       | 87     | 81       | 81     | 85       | 71     | 74       | 70     | 73       |
| Ethyl acetate*               |         | 1      | 2        | 0      | 1        | 91     | 84       | 84     | 87       | 70     | 76       | 2      | 3        |
| Methanol*                    |         | 94     | 92       | 105    | 102      | 98     | 85       | 90     | 88       | 76     | 73       | 75     | 75       |
| Acetone/Ethyl acetate=1/1*   |         | 80     | 84       | 45     | 47       | 93     | 88       | 87     | 91       | 63     | 67       | 67     | 69       |
| Acetone/Ethyl acetate=1/4*   |         | 68     | 72       | 28     | 29       | 96     | 87       | 85     | 89       | 61     | 65       | 15     | 16       |
| Acetone/Ethyl acetate=4/1*   |         | 87     | 89       | 53     | 55       | 111    | 95       | 91     | 92       | 82     | 83       | 83     | 82       |
| Acetone/Methanol=1/1*        |         | 96     | 97       | 107    | 107      | 97     | 94       | 94     | 94       | 69     | 70       | 68     | 64       |
| Acetone/Methanol=1/4*        |         | 81     | 85       | 95     | 99       | 88     | 83       | 82     | 86       | 53     | 56       | 46     | 49       |
| Acetone/Methanol=4/1*        |         | 87     | 88       | 97     | 99       | 97     | 89       | 88     | 90       | 61     | 61       | 59     | 60       |
| Methanol/Ethyl acetate=1/1*  |         | 83     | 90       | 97     | 106      | 98     | 88       | 84     | 89       | 53     | 56       | 52     | 55       |
| Methanol/Ethyl acetate=1/4*  |         | 81     | 88       | 97     | 104      | 92     | 87       | 83     | 89       | 68     | 73       | 72     | 77       |
| Methanol/Ethyl acetate=4/1*  |         | 88     | 92       | 94     | 97       | 97     | 85       | 88     | 91       | 63     | 67       | 71     | 74       |
| Methanol**                   | Average | 116    | 110      | 134    | 127      | 108    | 96       | 96     | 92       | 76     | 72       | 77     | 72       |
|                              | %RSD    | 2.4    | 2.0      | 4.9    | 8.7      | 1.7    | 2.4      | 2.1    | 1.5      | 8.8    | 4.7      | 13     | 7.2      |
| Methanol/Ethyl acetate=1/4** | Average | 104    | 100      | 92     | 89       | 104    | 90       | 87     | 87       | 85     | 82       | 86     | 82       |
|                              | %RSD    | 2.8    | 5.3      | 13     | 12       | 2.1    | 3.7      | 3.4    | 3.6      | 1.1    | 4.3      | 10     | 9.3      |

1) Compound abbreviations correspond to those shown in Table S1.

2) \*: n=1, \*\*: n=3
