# Supplementary material
Source: publisher figshare collection journal article supplement (https://tandf.figshare.com/articles/dataset/_/8957879)
Supplement: Supplementary file 3 [file 1]

Table S2. LC conditions

|                      |                                                                                  |                                                  |
|----------------------|----------------------------------------------------------------------------------|--------------------------------------------------|
| HPLC:                | Agilent 1100 series (Agilent Technologies)                                       |                                                  |
| Separation column:   | Atlantis T3 (C18, 150 mm, 2.1 mm i.d, 3 μm particle size, Waters)                |                                                  |
| Mobile phase:        | Solvent A, 0.01% Formic acid and 0.5 mM ammonium acetate in ultra-purified water |                                                  |
|                      | Solvent B, 0.01% Formic acid and 0.5 mM ammonium acetate in methanol             |                                                  |
| Flow rate:           | 0.2 mL min <sup>-1</sup> (Positive, Negative)                                    |                                                  |
| Column temperature:  | 40°C (Positive, Negative)                                                        |                                                  |
| Injection volume:    | 10 μL (Positive, Negative)                                                       |                                                  |
| LC gradient program: |                                                                                  |                                                  |
|                      | Time (min)                                                                       | Solvent A (%)                      Solvent B (%) |
| Positive             |                                                                                  |                                                  |
|                      | 0.0                                                                              | 95                      5                        |
|                      | 1.0                                                                              | 60                      40                       |
|                      | 3.0                                                                              | 60                      40                       |
|                      | 5.0                                                                              | 25                      75                       |
|                      | 8.0                                                                              | 25                      75                       |
|                      | 12.0                                                                             | 5                      95                        |
|                      | 15.0                                                                             | 5                      95                        |
|                      | 15.5                                                                             | 95                      5                        |
|                      | 25.0                                                                             | 95                      5                        |
| Negative             |                                                                                  |                                                  |
|                      | 0.0                                                                              | 90                      10                       |
|                      | 2.0                                                                              | 10                      90                       |
|                      | 12.0                                                                             | 10                      90                       |
|                      | 12.5                                                                             | 90                      10                       |
|                      | 22.0                                                                             | 90                      10                       |
